# Supplementary material for: <strong>Long COVID, A Comprehensive Systematic Scoping Review</strong>
Source: Preprints.org preprint supplement (doi:10.20944/preprints202103.0490.v1), 2021-03-18
Supplement: Supplementary file 1 [file supplementary]

| No. | Authors | Country of 1st author | 1st author region | 1st author country’s income level | Date of the published article | Date of submission | Title | Category | Main topics | Type of paper | The methodology of original articles | Country of the population involved in the original studies | No. of patients | The region of the population involved in the study | The income level of the populations’ country |
| --- | --- | --- | --- | --- | --- | --- | --- | --- | --- | --- | --- | --- | --- | --- | --- |
| 1 | Eswaran et al.(1) | USA | North America | High | Jan 2021 | Nov 2020 | Vascular thromboembolic events following COVID‐19 hospital discharge: incidence and risk factors | Signs and Symptoms | Thromboembolism | Brief report | Cohort | USA | 447 | North America | High |
| 2 | Zampogna et al.(2) | Italy | Europe and Central Asia | High | Jan 2021 | Oct 2020 | Functional impairment during post-acute COVID-19 phase: Preliminary finding in 56 patients | Signs and Symptoms | Musculoskeletal | Letter (with original information) | Cross-sectional | Italy | 56 | Europe and Central Asia | High |
| 3 | Xiong et al.(3) | China | East Asia and Pacific | Upper-Middle | Jan 2021 | Jul 2020 | Clinical sequelae of COVID-19 survivors in Wuhan, China: a single-centre longitudinal study | Signs and Symptoms | Multi-system | Original paper | Cohort | China | 538 | East Asia and Pacific | Upper-Middle |
| 4 | Wijeratne et al. (4) | Australia | East Asia and Pacific | High | Jan 2021 | Not mentioned | COVID 19 and long-term neurological problems | Pathophysiology | Neurology | Editorial | NA | NA | NA | NA | NA |
| 5 | Tsivgoulis et al. (5) | Greece | Europe and Central Asia | High | Sep 2020 | Not mentioned | Olfactory bulb and mucosa abnormalities in persistent COVID-19-induced anosmia: a magnetic resonance imaging study | Pathophysiology | Neurology | Letter (with original information) | Cross-sectional | Greece | 8 | Europe and Central Asia | High |
| 6 | Truffaut Et al.(6) | Belgium | Europe and Central Asia | High | Jan 2021 | Aug 2020 | Post-discharge critical COVID-19 lung function related to severity of radiologic lung involvement at admission | Signs and Symptoms | Respiratory | Letter (with original information) | Cohort | Belgium | 63 | Europe and Central Asia | High |
| 7 | Stefano et al. (7) | Czech Republic | Europe and Central Asia | High | Jan 2021 | Jan 2021 | Selective Neuronal Mitochondrial Targeting in SARS-CoV-2 Infection Affects Cognitive Processes to Induce 'Brain Fog' and Results in Behavioral Changes that Favor Viral Survival | Pathophysiology | Neurology | Editorial | NA | NA | NA | NA | NA |
| 8 | Starekova et al.(8) | USA | North America | High | Jan 2021 | Not mentioned | Evaluation for Myocarditis in Competitive Student Athletes Recovering From Coronavirus Disease 2019 With Cardiac Magnetic Resonance Imaging | Management | Back to usual activity | Brief report | Case series | USA | 145 | North America | High |
| 9 | Rolfe et al.(9) | USA | North America | High | Jan 2021 | Not mentioned | The Emerging Chronic Sequelae of COVID-19 and Implications for North Carolina | Signs and Symptoms | Multi-system | Commentary | NA | NA | NA | NA | NA |
| 10 | Raveendran(10) | india | South Asia | Lower-Middle | Nov 2020 | Nov 2020 | Long COVID-19: Challenges in the diagnosis and proposed diagnostic criteria | Diagnosis | NA | Commentary | NA | NA | NA | NA | NA |
| 11 | Rashidi et al. (11) | Iran | Middle East and North Africa | Upper-Middle | Feb 2021 | Sep 2020 | Incidence of symptomatic venous thromboembolism following hospitalization for coronavirus disease 2019: Prospective results from a multi-center study | Signs and Symptoms | Thromboembolism | Original paper | Cohort | Iran | 1529 | Middle East and North Africa | Upper-Middle |
| 12 | Raahimi et al.(12) | UK | Europe and Central Asia | High | Jan 2021 | Not mentioned | Late onset of Guillain-Barré syndrome following SARS-CoV-2 infection: part of 'long COVID-19 syndrome'? | Signs and Symptoms | Neurology | Case report | Case report | UK | 1 | Europe and Central Asia | High |
| 13 | Moreno-Pérez et al.(13) | Spain | Europe and Central Asia | High | Jan 2021 | Not mentioned | Post-acute COVID-19 Syndrome. Incidence and risk factors: a Mediterranean cohort study | Signs and Symptoms | Multi-system | Original paper | Cohort | Spain | 277 | Europe and Central Asia | High |
| 14 | Mendelson et al.(14) | South Africa | Sub-Saharan Africa | Upper-Middle | Nov 2020 | Nov 2020 | Long-COVID: An evolving problem with an extensive impact | Mixed | All | Clinical update | NA | NA | NA | NA | NA |
| 15 | McMahon et al.(15) | USA | North America | High | Jan 2021 | Not mentioned | Long COVID in the skin: a registry analysis of COVID-19 dermatological duration | Signs and Symptoms | Cutaneous | Comment (with original information) | Cross-sectional | Multinational from 41 country | NA | Multinational | Multinational |
| 16 | Manolis et al.(16) | Greece | Europe and Central Asia | High | Jan 2021 | Not mentioned | Long COVID: An Emerging Puzzle: Long Covid | Signs and Symptoms | Multi-system | Editorial | NA | NA | NA | NA | NA |
| 17 | Laads et al. (17) | UK | Europe and Central Asia | High | Jan 2021 | Not mentioned | Developing services for long COVID: lessons from a study of wounded healers | Management | General care | Original paper | Qualitative | UK | 43 | Europe and Central Asia | High |
| 18 | Kumar et al. (18) | India | South Asia | Lower-Middle | Jan 2021 | Not mentioned | Post COVID-19 sequelae: venous thromboembolism complicated by lower GI bleed | Signs and Symptoms | Thromboembolism | Case report | Case report | India | 1 | South Asia | Lower-Middle |
| 19 | Kandemirli et al. (19) | Turkey | Europe and Central Asia | Upper-Middle | Jan 2021 | Sep 2020 | Olfactory Bulb MRI and Paranasal Sinus CT Findings in Persistent COVID-19 Anosmia | Pathophysiology | Neurology | Original paper | Cross-sectional | Turkey | 23 | Europe and Central Asia | Upper-Middle |
| 20 | Doykov et al. (20) | UK | Europe and Central Asia | High | Nov 2020 | Not mentioned | 'The long tail of Covid-19' - The detection of a prolonged inflammatory response after a SARS-CoV-2 infection in asymptomatic and mildly affected patients | Pathophysiology | Multi-system | Original paper | Cohort | UK | 10 | Europe and Central Asia | High |
| 21 | Halpin et al. (21) | UK | Europe and Central Asia | High | Feb 2021 | Jul 2020 | Postdischarge symptoms and rehabilitation needs in survivors of COVID‐19 infection: A cross‐sectional evaluation | Signs and Symptoms | Multi-system | Original paper | Cross-sectional | UK | 100 | Europe and Central Asia | High |
| 22 | Guler (22) | Switzerland | Europe and Central Asia | High | Jan 2021 | Sep 2020 | Pulmonary function and radiological features four months after COVID-19: first results from the national prospective observational Swiss COVID-19 lung study | Signs and Symptoms | Respiratory | Original paper | Cohort | Switzerland | 113 | Europe and Central Asia | High |
| 23 | Guedj et al. (23) | France | Europe and Central Asia | High | Jan 2021 | Nov 2020 | (18)F-FDG brain PET hypometabolism in patients with long COVID | Pathophysiology | Neurology | Original paper | Cross-sectional | France | 35 | Europe and Central Asia | High |
| 24 | Fisher (24) | USA | North America | High | Jan 2021 | Nov 2020 | Symptoms and recovery among adult outpatients with and without COVID-19 at 11 healthcare facilities—July 2020, United States | Signs and Symptoms | Multi-system | Original paper | Case-control | USA | 157 | North America | High |
| 25 | Dani et al.(25) | UK | Europe and Central Asia | High | Nov 2020 | Not mentioned | Autonomic dysfunction in 'long COVID': rationale, physiology, and management strategies | Mixed | Cardiovascular | Case series | Case series | UK | 5 | Europe and Central Asia | High |
| 26 | Curci et al. (26) | Italy | Europe and Central Asia | High | Jan 2021 | Oct 2020 | Functional outcome after inpatient rehabilitation in post-intensive care unit COVID-19 patients: findings and clinical implications from a real-practice retrospective study | Management | Rehabilitation care | Original paper | Cohort | Italy | 41 | Europe and Central Asia | High |
| 27 | Bickton et al. (27) | UK | Europe and Central Asia | High | Jan 2021 | Not mentioned | An improvised pulmonary tele-rehabilitation programme for post-acute COVID-19 patients would be feasible and acceptable in a low-resource setting: a case report | Management | Rehabilitation care | Case report | Case report | Malawi | 1 | Sub-Saharan Africa | Low |
| 28 | Bellan et al. (28) | Italy | Europe and Central Asia | High | Jan 2021 | Not mentioned | Respiratory and Psychophysical Sequelae Among Patients With COVID-19 Four Months After Hospital Discharge | Signs and Symptoms | Multi-system | Brief report | Cohort | Italy | 238 | Europe and Central Asia | High |
| 29 | Y.-m. Zhao et al. (29) | China | East Asia and Pacific | Upper-Middle | Jul 2020 | Jun 2020 | Follow-up study of the pulmonary function and related physiological characteristics of COVID-19 survivors three months after recovery | Signs and Symptoms | Respiratory | Original paper | Cohort | China | 55 | East Asia and Pacific | Upper-Middle |
| 30 | D. Yelin et al. (30) | Israel | Middle East and North Africa | High | Dec 2020 | Oct 2020 | Long COVID-19—it's not over until? | Signs and Symptoms | Multi-system | Commentary | NA | NA | NA | NA | NA |
| 31 | E. Wood et al. (31) | New Zealand | East Asia and Pacific | High | Nov 2020 | Oct 2020 | Role of mitochondria, oxidative stress and the response to antioxidants in myalgic encephalomyelitis/chronic fatigue syndrome: a possible approach to SARS-CoV-2 'long-haulers'? | Pathophysiology | General (Fatigue) | Review (narrative) | NA | NA | NA | NA | NA |
| 32 | D. T. Wade (32) | UK | Europe and Central Asia | High | Jul 2020 | Not mentioned | Rehabilitation after COVID-19: an evidence-based approach | Management | Rehabilitation care | Report | NA | NA | NA | NA | NA |
| 33 | M. Vink et al. (33) | The Netherlands | Europe and Central Asia | High | Dec 2020 | Oct 2020 | Could Cognitive Behavioural Therapy Be an Effective Treatment for Long COVID and Post COVID-19 Fatigue Syndrome? Lessons from the Qure Study for Q-Fever Fatigue Syndrome | Management | Rehabilitation care | Review (narrative) | NA | NA | NA | NA | NA |
| 34 | B. van den Borst et al . (34) | The Netherlands | Europe and Central Asia | High | Nov 2020 | Not mentioned | Comprehensive health assessment three months after recovery from acute COVID-19 | Signs and Symptoms | Multi-system | Original paper | Cross-sectional | The Netherlands | 124 | Europe and Central Asia | High |
| 35 | A. Tumlinson et al. (35) | USA | North America | High | Apr 2020 | Apr 2020 | Post‐acute care preparedness in a COVID‐19 world | Management | Multi-care | Special article |  | NA | NA | NA | NA |
| 36 | L. Townsend et al. (36) | Ireland | Europe and Central Asia | High | Nov 2020 | Jul 2020 | Persistent fatigue following SARS-CoV-2 infection is common and independent of severity of initial infection | Signs and Symptoms | General (Fatigue) | Original paper | Cross-sectional | Ireland | 128 | Europe and Central Asia | High |
| 37 | A. Touré et al. (37) | Guinea | Sub-Saharan Africa | Low | Dec 2020 | Sep 2020 | Post-COVID-19 Late Pulmonary Embolism in a Young Woman about a Case | Signs and Symptoms | Thromboembolism | Case report | Case report | Guinea | 1 | Sub-Saharan Africa | Low |
| 38 | R. Torres-Castro et al. (38) | Chile | Latin America and The Caribbean | High | Nov 2020 | Sep 2020 | Respiratory function in patients post-infection by COVID-19: a systematic review and meta-analysis | Signs and Symptoms | Respiratory | Systematic Review | NA | NA | NA | NA | NA |
| 39 | L. The (39) | - | - | - | Dec 2020 | Not mentioned | Facing up to long COVID | Mixed | All | Editorial | NA | NA | NA | NA | NA |
| 40 | S. M. H. Tabatabaei et al. (40) | Iran | Middle East and North Africa | Upper-Middle | Nov 2020 | Sep 2020 | Chest CT in COVID-19 pneumonia: what are the findings in mid-term follow-up? | Signs and Symptoms | Respiratory | Original paper | Cross-sectional | Iran | 52 | Middle East and North Africa | Upper-Middle |
| 41 | T. Sun et al. (41) | China | East Asia and Pacific | Upper-Middle | Oct 2020 | Jul 2020 | Rehabilitation of patients with COVID-19 | Management | Rehabilitation care | Review (narrative) |  | NA | NA | NA | NA |
| 42 | M. Sollini et al. (42) | Italy | Europe and Central Asia | High | Oct 2020 | Sep 2020 | Vasculitis changes in COVID-19 survivors with persistent symptoms: an [18F] FDG-PET/CT study | Pathophysiology | Cardiovascular | Short communication (with original information) | Cross-sectional | Italy | 10 | Europe and Central Asia | High |
| 43 | M. Sivan et al. (43) | UK | Europe and Central Asia | High | Dec 2020 | Not mentioned | NICE guideline on long covid | Mixed | All | Editorial |  | NA | NA | NA | NA |
| 44 | A. S. Shah et al. (44) | Canada | North America | High | Dec 2020 | Oct 2020 | A prospective study of 12-week respiratory outcomes in COVID-19-related hospitalizations | Signs and Symptoms | Respiratory | Brief communication | Cohort | Canada | 60 | North America | High |
| 45 | R. Salisbury et al. (45) | UK | Europe and Central Asia | High | Dec 2020 | Sep 2020 | Incidence of symptomatic, image-confirmed venous thromboembolism following hospitalization for COVID-19 with 90-day follow-up | Signs and Symptoms | Thromboembolism | Original paper | Cross-sectional | UK | 303 | Europe and Central Asia | High |
| 46 | L. N. Roberts et al. (46) | UK | Europe and Central Asia | High | Sep 2020 | Jul 2020 | Postdischarge venous thromboembolism following hospital admission with COVID-19 | Signs and Symptoms | Thromboembolism | Original paper | Cohort | UK | 1877 | Europe and Central Asia | High |
| 47 | V. O. Puntmann et al. (47) | Germany | Europe and Central Asia | High | Jul 2020 | Not mentioned | Outcomes of cardiovascular magnetic resonance imaging in patients recently recovered from coronavirus disease 2019 (COVID-19) | Signs and Symptoms | Cardiovascular | Original paper | Cohort | Germany | 100 | Europe and Central Asia | High |
| 48 | B. Puchner et al. (48) | Austria | Europe and Central Asia | High | Jan 2021 | Aug 2020 | Beneficial effects of multidisciplinary rehabilitation in post-acute COVID-19 | Management | Rehabilitation care | Original paper | Cohort | Austria | 23 | Europe and Central Asia | High |
| 49 | M. Pinto et al. (49) | Italy | Europe and Central Asia | High | Dec 2020 | Oct 2020 | Post-acute covid-19 rehabilitation network proposal: From intensive to extensive and home-based it supported services | Management | Rehabilitation care | Guideline | NA | NA | NA | NA | NA |
| 50 | M. S. Petersen et al. (50) | Faroe Islands | Europe and Central Asia | High | Nov 2020 | Oct 2020 | Long COVID in the Faroe Islands-a longitudinal study among non-hospitalized patients | Signs and Symptoms | Multi-system | Original paper | Cohort | Faroe Island | 180 | Europe and Central Asia | High |
| 51 | E. Perego et al. (51) | UK | Europe and Central Asia | High | Sep 2020 | Not mentioned | Why the Patient-Made Term'Long Covid'is needed | Nomenclature | NA | Letter (without original information) | NA | NA | NA | NA | NA |
| 52 | R. Patell et al. (52) | USA | North America | High | Sep 2020 | Jun 2020 | Postdischarge thrombosis and hemorrhage in patients with COVID-19 | Signs and Symptoms | Thromboembolism | Brief report | Cohort | USA | 163 | North America | High |
| 53 | M. Paneroni et al. (53) | Italy | Europe and Central Asia | High | Feb 2021 | Not mentioned | Muscle strength and physical performance in patients without previous disabilities recovering from COVID-19 pneumonia | Signs and Symptoms | Musculoskeletal | Original paper | Cross-sectional | Italy | 41 | Europe and Central Asia | High |
| 54 | S. Negrini et al. (54) | Italy | Europe and Central Asia | High | Mar 2020 | Mar 2020 | Facing in real time the challenges of the COVID-19 epidemic for rehabilitation | Management | Rehabilitation care | Editorial | NA | NA | NA | NA | NA |
| 55 | S. B. Morris et al. (55) | USA | North America | High | Oct 2020 | Not mentioned | Case Series of Multisystem Inflammatory Syndrome in Adults Associated with SARS-CoV-2 Infection - United Kingdom and United States, March-August 2020 | Signs and Symptoms | MIS in adults | Case series | Case series | Multinational | 16 | Multinational | Multinational |
| 56 | R. D. Mitrani et al. (56) | USA | North America | High | Jun 2020 | Not mentioned | COVID-19 cardiac injury: Implications for long-term surveillance and outcomes in survivors | Signs and Symptoms | Cardiovascular | Review (narrative) | NA | NA | NA | NA | NA |
| 57 | A. Miller (57) | UK | Europe and Central Asia | High | Nov 2020 | Not mentioned | COVID-19: not just an acute illness | Mixed | All | Letter (without original information) | NA | NA | NA | NA | NA |
| 58 | M. G. Miglis et al. (58) | USA | North America | High | Sep 2020 | Aug 2020 | A case report of postural tachycardia syndrome after COVID-19 | Signs and Symptoms | Cardiovascular | Case report | Case report | USA | 1 | North America | High |
| 59 | J. C. McMurray et al. (59) | USA | North America | High | Dec 2020 | Nov 2020 | Multisystem Inflammatory Syndrome in Children (MIS-C), a Post-viral Myocarditis and Systemic Vasculitis-A Critical Review of Its Pathogenesis and Treatment | Pathophysiology | Pediatric Long COVID (MIS) | Review (narrative) | NA | NA | NA | NA | NA |
| 60 | M. G. Mazza et al. (60) | Italy | Europe and Central Asia | High | Jul 2020 | Jul 2020 | Anxiety and depression in COVID-19 survivors: Role of inflammatory and clinical predictors | Signs and Symptoms | Mental health | Original paper | Cohort | Italy | 402 | Europe and Central Asia | High |
| 61 | S. Mandal et l. (61) | UK | Europe and Central Asia | High | Nov 2020 | Jul 2020 | 'Long-COVID': A cross-sectional study of persisting symptoms, biomarker and imaging abnormalities following hospitalisation for COVID-19 | Signs and Symptoms | Multi-system | Brief communication | Cross-sectional | UK | 384 | Europe and Central Asia | High |
| 62 | J. F. Ludvigsson (62) | Sweden | Europe and Central Asia | High | Nov 2020 | Nov 2020 | Case report and systematic review suggest that children may experience similar long‐term effects to adults after clinical COVID‐19 | Signs and Symptoms | Pediatric Long COVID | Case series | Case series | Sweden | 5 | Europe and Central Asia | High |
| 63 | Y. Lu et al. (63) | China | East Asia and Pacific | Upper-Middle | Aug 2020 | Jun 2020 | Cerebral micro-structural changes in COVID-19 patients–an MRI-based 3-month follow-up study | Pathophysiology | Neurology | Original paper | Cross-sectional | China | 60 | East Asia and Pacific | Upper-Middle |
| 64 | K. Liu et al. (64) | China | East Asia and Pacific | Upper-Middle | Apr 2020 | Mar 2020 | Respiratory rehabilitation in elderly patients with COVID-19: A randomized controlled study | Management | Rehabilitation care | Original paper | RCT | China | 72 | East Asia and Pacific | Upper-Middle |
| 65 | C. Liu et al. (65) | China | East Asia and Pacific | Upper-Middle | Jul 2020 | Apr 2020 | Chest computed tomography and clinical follow-up of discharged patients with COVID-19 in Wenzhou City, Zhejiang, China | Signs and Symptoms | Respiratory | Original paper | longitudinal observational | China | 51 | East Asia and Pacific | Upper-Middle |
| 66 | L. Liang et al. (66) | China | East Asia and Pacific | Upper-Middle | Nov 2020 | Aug 2020 | Three-Month Follow-Up Study of Survivors of Coronavirus Disease 2019 after Discharge | Signs and Symptoms | Multi-system | Original paper | Cohort | China | 76 | East Asia and Pacific | Upper-Middle |
| 67 | Z. Li et al. (67) | China | East Asia and Pacific | Upper-Middle | Jun 2020 | Apr 2020 | Rehabilitation needs of the first cohort of post-acute COVID-19 patients in Hubei, China | Management | Rehabilitation care | Original paper | Cross-sectional | China | 280 | East Asia and Pacific | Upper-Middle |
| 68 | T. V. Lerum et al. (68) | Norway | Europe and Central Asia | High | Dec 2020 | Sep 2020 | Dyspnoea, lung function and CT findings three months after hospital admission for COVID-19 | Signs and Symptoms | Respiratory | Original paper | Cohort | Norway | 103 | Europe and Central Asia | High |
| 69 | E. Ladds et al. (69) | UK | Europe and Central Asia | High | Dec 2020 | Nov 2020 | Persistent symptoms after Covid-19: qualitative study of 114 “long Covid” patients and draft quality principles for services | Management | General care | Original paper | Qualitative | UK | 114 | Europe and Central Asia | High |
| 70 | T. Kingstone et al. (70) | UK | Europe and Central Asia | High | Dec 2020 | Sep 2020 | Finding the 'right' GP: a qualitative study of the experiences of people with long-COVID | Management | General care | Original paper | Qualitative | Not mentioned | 24 | NA | NA |
| 71 | H.-j. Jiang et al. (71) | China | East Asia and Pacific | Upper-Middle | Mar 2020 | Feb 2020 | Psychological impacts of the COVID-19 epidemic on Chinese people: Exposure, post-traumatic stress symptom, and emotion regulation | Signs and Symptoms | Mental health | Original paper | Cross-sectional | China | 6049 | East Asia and Pacific | Upper-Middle |
| 72 | L. G. Jacobs et al. (72) | USA | North America | High | Dec 2020 | Aug 2020 | Persistence of symptoms and quality of life at 35 days after hospitalization for COVID-19 infection | Signs and Symptoms | Multi-system | Original paper | Cross-sectional | USA | 183 | North America | High |
| 73 | Ł. A. Małek et al. (73) | China | East Asia and Pacific | Upper-Middle | Nov 2020 | Apr 2020 | Cardiac Involvement in Patients Recovered From COVID-2019 Identified Using Magnetic Resonance Imaging | Signs and Symptoms | Cardiovascular | Original paper | Cross-sectional | China | 26 | East Asia and Pacific | Upper-Middle |
| 74 | M. Honigsbaum et al. (74) | UK | Europe and Central Asia | High | Oct 2020 | Not mentioned | Taking pandemic sequelae seriously: from the Russian influenza to COVID-19 long-haulers | History of medicine | NA | Perspectives | NA | NA | NA | NA | NA |
| 75 | V. Higgins et al. (75) | Canada | North America | High | Dec 2020 | Oct 2020 | COVID-19: from an acute to chronic disease? Potential long-term health consequences | Signs and Symptoms | Multi-system | Review (narrative) | NA | NA | NA | NA | NA |
| 76 | T. Greenhalgh et al. (76) | UK | Europe and Central Asia | High | Aug 2020 | Not mentioned | Management of post-acute covid-19 in primary care | Management | Multi-care | Practice | NA | NA | NA | NA | NA |
| 77 | T. Greenhalgh et al. (77) | UK | Europe and Central Asia | High | Dec 2020 | Not mentioned | Long COVID: A Primer for Family Physicians | Management | General care | Editorial | NA | NA | NA | NA | NA |
| 78 | Y. M. J. Goërtz et al. (78) | The Netherlands | Europe and Central Asia | High | Oct 2020 | Jul 2020 | Persistent symptoms 3 months after a SARS-CoV-2 infection: the post-COVID-19 syndrome? | Signs and Symptoms | Multi-system | Original paper | Cross-sectional | Multinational | 2113 | Multinational | Multinational |
| 79 | S. Godfred-Cato et al. (79) | USA | North America | High | Aug 2020 | Not mentioned | COVID-19-Associated Multisystem Inflammatory Syndrome in Children - United States, March-July 2020 | Signs and Symptoms | Pediatric Long COVID (MIS) | Original paper | Cross-sectional | USA | 570 | North America | High |
| 80 | P. M. George et al. (80) | UK | Europe and Central Asia | High | Aug 2020 | May 2020 | Respiratory follow-up of patients with COVID-19 pneumonia | Management | General care | Guideline | NA | NA | NA | NA | NA |
| 81 | E. Garrigues et al. (81) | France | Europe and Central Asia | High | Dec 2020 | Not mentioned | Post-discharge persistent symptoms and health-related quality of life after hospitalization for COVID-19 | Signs and Symptoms | Multi-system | Letter (with original information) | Cross-sectional | France | 120 | Europe and Central Asia | High |
| 82 | G. Forte et al. (82) | Italy | Europe and Central Asia | High | Jun 2020 | Apr 2020 | COVID-19 Pandemic in the Italian Population: Validation of a Post-Traumatic Stress Disorder Questionnaire and Prevalence of PTSD Symptomatology | Management | Development of COVID-19 psychometric tools | Original paper | Cross-sectional | Italy | 2286 | Europe and Central Asia | High |
| 83 | F. Ferraro et al. (83) | Italy | Europe and Central Asia | High | Dec 2020 | Nov 2020 | COVID‐19 related fatigue: which role for rehabilitation in post‐COVID‐19 patients? A case series | Management | Rehabilitation care | Letter (with original information) | Case series | Italy | 7 | Europe and Central Asia | High |
| 84 | M. Engelen et al. (84) | The Netherlands | Europe and Central Asia | High | May 2020 | Not mentioned | Incidence of venous thromboembolism in patients discharged after COVID-19 hospitalisation | Signs and Symptoms | Thromboembolism | Original paper | Cohort | The Netherlands | 198 | Europe and Central Asia | High |
| 85 | C. Curci et al. (85) | Italy | Europe and Central Asia | High | Oct 2020 | Not mentioned | Early rehabilitation in post-acute COVID-19 patients: data from an Italian COVID-19 Rehabilitation Unit and proposal of a treatment protocol | Management | Rehabilitation care | Original paper | Cross-sectional | Italy | 32 | Europe and Central Asia | High |
| 86 | Nature editorial office (86) | - | - | - | Oct 2020 | Not mentioned | let patients help define long-lasting COVID symptoms | Nomenclature | NA | Editorial | NA | NA | NA | NA | NA |
| 87 | C. Carvalho-Schneider et al. (87) | France | Europe and Central Asia | High | Oct 2020 | Jun 2020 | Follow-up of adults with noncritical COVID-19 two months after symptom onset | Signs and Symptoms | Multi-system | Original paper | Cohort | France | 150 | Europe and Central Asia | High |
| 88 | A. Carfì et al. (88) | Italy | Europe and Central Asia | High | Jul 2020 | Not mentioned | Persistent Symptoms in Patients After Acute COVID-19 | Signs and Symptoms | Multi-system | Letter (with original information) | Cross-sectional | Italy | 143 | Europe and Central Asia | High |
| 89 | F. Callard et al. (89) | UK | Europe and Central Asia | High | Oct 2020 | Not mentioned | How and why patients made Long Covid | Mixed | All | Short communication (without original information) | NA | NA | NA | NA | NA |
| 90 | D. Brito et al. (90) | USA | North America | High | Nov 2020 | Aug 2020 | High Prevalence of Pericardial Involvement in College Student Athletes Recovering From COVID-19 | Signs and Symptoms | Cardiovascular | Original paper | Cross-sectional | USA | 54 | North America | High |
| 91 | G. Boyraz et al. (91) | USA | North America | High | May 2020 | Not mentioned | Coronavirus Disease (COVID-19) and Traumatic Stress: Probable Risk Factors and Correlates of Posttraumatic Stress Disorder | Management | Risk factors of mental health | Review (narrative) | NA | NA | NA | NA | NA |
| 92 | P. Boscolo-Rizzo et al. (92) | Italy | Europe and Central Asia | High | Jul 2020 | Not mentioned | Evolution of altered sense of smell or taste in patients with mildly symptomatic COVID-19 | Signs and Symptoms | Neurology | Original paper | Cross-sectional | Italy | 202 | Europe and Central Asia | High |
| 93 | S. Belli et al. (93) | Italy | Europe and Central Asia | High | Oct 2020 | Jun 2020 | Low physical functioning and impaired performance of activities of daily life in COVID-19 patients who survived hospitalisation | Signs and Symptoms | Multi-system | Original paper | Cross-sectional | Italy | 103 | Europe and Central Asia | High |
| 94 | R. C. X. Becker (94) | USA | North America | High | Sep 2020 | Not mentioned | Anticipating the long-term cardiovascular effects of COVID-19 | Pathophysiology | Cardiovascular | Editorial | NA | NA | NA | NA | NA |
| 95 | M. Bastopcu (95) | Turkey | Europe and Central Asia | Upper-Middle | Dec 2020 | Sep 2020 | Extensive arterial thrombus following discharge after a Covid-19 infection | Signs and Symptoms | Thromboembolism | Case report | Case report | Turkey | 1 | Europe and Central Asia | Upper-Middle |
| 96 | R. M. Barker-Davies et al. (96) | UK | Europe and Central Asia | High | Jul 2020 | Not mentioned | The Stanford Hall consensus statement for post-COVID-19 rehabilitation | Management | Multi-care | Consensus | NA | NA | NA | NA | NA |
| 97 | A. M. Baig (97) | Pakistan | South Asia | Lower-Middle | Dec 2020 | Nov 2020 | Deleterious Outcomes in Long-Hauler COVID-19: The Effects of SARS-CoV-2 on the CNS in Chronic COVID Syndrome | Pathophysiology | Neurology | Viewpoint | NA | NA | NA | NA | NA |
| 98 | M. Asim et al. (98) | Qatar | Middle East and North Africa | High | Jun 2020 | Jun 2020 | Coronavirus Disease (COVID-19) and the risk of Post-Traumatic Stress Disorder: A mental health concern in Nepal | Signs and Symptoms | Mental health | Viewpoint | NA | NA | NA | NA | NA |
| 99 | D. T. Arnold et al. (99) | UK | Europe and Central Asia | High | Dec 2020 | Aug 2020 | Patient outcomes after hospitalisation with COVID-19 and implications for follow-up: results from a prospective UK cohort | Signs and Symptoms | Multi-system | Brief communication | Cohort | UK | 110 | Europe and Central Asia | High |
| 100 | E. M. Amenta et al. (100) | USA | North America | High | Oct 2020 | Sep 2020 | Postacute COVID-19: An Overview and Approach to Classification | Mixed | All | Review (narrative) | NA | NA | NA | NA | NA |
| 101 | A. Altundag et al. (101) | Turkey | Europe and Central Asia | Upper-Middle | Nov 2020 | Oct 2020 | The temporal course of COVID-19 anosmia and relation to other clinical symptoms | Signs and Symptoms | Neurology | Original paper | Cross-sectional | Turkey | 135 | Europe and Central Asia | Upper-Middle |
| 102 | Nature medicine editorial office (102) | - | - | - | Dec 2020 | Not mentioned | Meeting the challenge of long COVID | Mixed | All | Editorial | NA | NA | NA | NA | NA |
| 103 | O. Hertting (103) | Sweden | Europe and Central Asia | High | Jan 2021 | Dec 2020 | More research is needed on the long-term effects of COVID-19 on children and adolescents | Signs and Symptoms | Pediatric Long COVID | Editorial | NA | NA | NA | NA | NA |
| 104 | National Institute for Health and Care Excellence (NICE) (104) | UK | Europe and Central Asia | High | Dec 2020 | Not mentioned | COVID-19 rapid guideline: managing the long-term effects of COVID-19 | Management | Multi-care | Guideline | NA | NA | NA | NA | NA |
| 105 | Myalgic Encephalomyelitis (ME) association(105) | UK | Europe and Central Asia | High | May 2020 | Not mentioned | Post-viral fatigue (PVF) and Post-viral fatigue syndrome (PVFS) following coronavirus infection | Management | Multi-care | Guideline | NA | NA | NA | NA | NA |
| 106 | E. Mahase (106) | UK | Europe and Central Asia | High | Oct 2020 | Not mentioned | Long covid could be four different syndromes, review suggests | Nomenclature | NA | News | NA | NA | NA | NA | NA |
| 107 | A. M. Baig (107) | Pakistan | South Asia | Lower-Middle | Oct 2020 | Not mentioned | Chronic COVID Syndrome: Need for an appropriate medical terminology for Long‐COVID and COVID Long‐Haulers | Nomenclature | NA | Commentary | NA | NA | NA | NA | NA |
| 118 | M. Marshall (108) | UK | Europe and Central Asia | High | Sep 2020 | Not mentioned | The lasting misery of coronavirus long-haulers | Signs and Symptoms | Multi-system | News | NA | NA | NA | NA | NA |
| 109 | A. Nath(109) | USA | North America | High | Sep 2020 | Not mentioned | Long-haul COVID | Mixed | All | Editorial | NA | NA | NA | NA | NA |
| 110 | D. Yelin et al. (110) | Israel | Middle East and North Africa | High | Sep 2020 | Not mentioned | Long-term consequences of COVID-19: research needs | Mixed | All | Commentary | NA | NA | NA | NA | NA |
| 111 | J. N. Siegelman (111) | USA | North America | High | Nov 2020 | Not mentioned | Reflections of a COVID-19 Long Hauler | Mixed | All | A Piece of my mind | NA | NA | NA | NA | NA |
| 112 | N. Nabavi (112) | UK | Europe and Central Asia | High | Sep 2020 | Not mentioned | Long covid: How to define it and how to manage it | Mixed | All | News | NA | NA | NA | NA | NA |
| 113 | J. Wise (113) | UK | Europe and Central Asia | High | Sep 2020 | Not mentioned | Long covid: doctors call for research and surveillance to capture disease | Management | Multi-care | News | NA | NA | NA | NA | NA |
| 114 | D. Salman et al. (114) | UK | Europe and Central Asia | High | Jan 2021 | Not mentioned | Returning to physical activity after covid-19 | Management | Rehabilitation care | Practice | NA | NA | NA | NA | NA |
| 115 | A. P. Smith (115) | UK | Europe and Central Asia | High | Jan 2021 | Not mentioned | Post-viral Fatigue: Implications for Long Covid | Signs and Symptoms | General (Fatigue) | Review (narrative) | NA | NA | NA | NA | NA |
| 116 | A. Basheer (116) | India | South Asia | Lower-Middle | Dec 2020 | Nov 2020 | Long COVID – Need for follow-up clinics | Management | Multi-care | Editorial | NA | NA | NA | NA | NA |
| 117 | M. Butler et al. (117) | UK | Europe and Central Asia | High | Oct 2020 | Not mentioned | Neuropsychiatric complications of covid-19 | Signs and Symptoms | Neurology | Editorial | NA | NA | NA | NA | NA |
| 118 | J. Burgers (118) | The Netherlands | Europe and Central Asia | High | Aug 2020 | Not mentioned | "Long covid": the Dutch response | Management | Multi-care | Letter (without original information) | NA | NA | NA | NA | NA |
| 119 | B. P. Shelley (119) | India | South Asia | Lower-Middle | Dec 2020 | Nov 2020 | Gaps in knowledge: Unmasking post-(Acute) COVID-19 syndrome and potential long-term complications in COVID-19 survivors | Mixed | All | Editorial | NA | NA | NA | NA | NA |
| 120 | P.J. Serrano-Castro et al. (120) | Spain | Europe and Central Asia | High | May 2020 | April 2020 | Impact of SARS-CoV-2 infection on neurodegenerative and neuropsychiatric diseases: A delayed pandemic? | Pathophysiology | Neurology | Review (narrative) | NA | NA | NA | NA | NA |

**Types of study:**

1. Cohort (retrospective and prospective)
2. Editorial, viewpoint, perspective, letter to editor, …
3. Case-control
4. Cross-sectional
5. Longitudinal study
6. RCT
7. Review
8. Case report/series
9. Qualitative
10. Guideline

**Category:**

1. Signs and symptoms
2. Pathophysiology
3. Management
4. Risk factor
5. Diagnosis
6. History of medicine
7. all

**Management:**

1. General care
2. Pharmacological care
3. Rehabilitation care
4. Back to usual activity
5. Multi-care

#### References:

#### 1. Eswaran H, Jarmul JA, Shaheen AW, Meaux D, Long T, Saccoccio D, et al. Vascular thromboembolic events following COVID‐19 hospital discharge: incidence and risk factors. Research and Practice in Thrombosis and Haemostasis.

#### 2. Zampogna E, Migliori GB, Centis R, Cherubino F, Facchetti C, Feci D, et al. Functional impairment during post-acute COVID-19 phase: Preliminary finding in 56 patients. Pulmonology. 2021.

#### 3. Xiong Q, Xu M, Li J, Liu Y, Zhang J, Xu Y, et al. Clinical sequelae of COVID-19 survivors in Wuhan, China: a single-centre longitudinal study. Clinical Microbiology and Infection. 2021;27(1):89-95 %@ 1198-743X.

#### 4. Wijeratne T, Crewther S. COVID-19 and long-term neurological problems: Challenges ahead with Post-COVID-19 Neurological Syndrome. Aust J Gen Pract. 2021;50.

#### 5. Tsivgoulis G, Fragkou PC, Lachanis S, Palaiodimou L, Lambadiari V, Papathanasiou M, et al. Olfactory bulb and mucosa abnormalities in persistent COVID-19-induced anosmia: a magnetic resonance imaging study. European Journal of Neurology. 2021;28(1):e6-e8.

#### 6. Truffaut L, Demey L, Bruyneel AV, Roman A, Alard S, De Vos N, et al. Post-discharge critical COVID-19 lung function related to severity of radiologic lung involvement at admission. Respiratory research. 2021;22(1):1-6 %@ 1465-993X.

#### 7. Stefano GB, Ptacek R, Ptackova H, Martin A, Kream RM. Selective Neuronal Mitochondrial Targeting in SARS-CoV-2 Infection Affects Cognitive Processes to Induce 'Brain Fog' and Results in Behavioral Changes that Favor Viral Survival. Med Sci Monit. 2021;27:e930886.

#### 8. Starekova J, Bluemke DA, Bradham WS, Eckhardt LL, Grist TM, Kusmirek JE, et al. Evaluation for Myocarditis in Competitive Student Athletes Recovering From Coronavirus Disease 2019 With Cardiac Magnetic Resonance Imaging. JAMA Cardiology. 2021.

#### 9. Rolfe RJ, Smith CM, Wolfe CR. The Emerging Chronic Sequelae of COVID-19 and Implications for North Carolina. N C Med J. 2021;82(1):75-8.

#### 10. Raveendran A. Long COVID-19: Challenges in the diagnosis and proposed diagnostic criteria. Diabetes & Metabolic Syndrome. 2020;15(1):145.

#### 11. Rashidi F, Barco S, Kamangar F, Heresi GA, Emadi A, Kaymaz C, et al. Incidence of symptomatic venous thromboembolism following hospitalization for coronavirus disease 2019: Prospective results from a multi-center study. Thrombosis Research. 2021;198:135-8.

#### 12. Raahimi MM, Kane A, Moore CE, Alareed AW. Late onset of Guillain-Barré syndrome following SARS-CoV-2 infection: part of 'long COVID-19 syndrome'? BMJ case reports. 2021;14(1).

#### 13. Moreno-Pérez O, Merino E, Leon-Ramirez JM, Andres M, Ramos JM, Arenas-Jiménez J, et al. Post-acute COVID-19 Syndrome. Incidence and risk factors: a Mediterranean cohort study. The Journal of infection. 2021.

#### 14. Mendelson M, Nel J, Blumberg L, Madhi SA, Dryden M, Stevens W, et al. Long-COVID: An evolving problem with an extensive impact. South African Medical Journal. 2021;111(1):10-3.

#### 15. McMahon DE, Gallman AE, Hruza GJ, Rosenbach M, Lipoff JB, Desai SR, et al. Long COVID in the skin: a registry analysis of COVID-19 dermatological duration. The Lancet Infectious Diseases.

#### 16. Manolis AS, Manolis TA. Long COVID: An Emerging Puzzle: Long COVID. Rhythmos. 2021;16(1):89-94.

#### 17. Ladds E, Rushforth A, Wieringa S, Taylor S, Rayner C, Husain L, et al. Developing services for long COVID: lessons from a study of wounded healers. Clinical Medicine. 2021;21(1):59.

#### 18. Kumar MA, Krishnaswamy M, Arul JN. Post COVID-19 sequelae: venous thromboembolism complicated by lower GI bleed. BMJ Case Reports CP. 2021;14(1):e241059.

#### 19. Kandemirli SG, Altundag A, Yildirim D, Sanli DET, Saatci O. Olfactory Bulb MRI and Paranasal Sinus CT Findings in Persistent COVID-19 Anosmia. Academic Radiology. 2021;28(1):28-35.

#### 20. Heywood WE, Doykov I, Hällqvist J, Gilmour KC, Grandjean L, Mills K. 'The long tail of Covid-19' - The detection of a prolonged inflammatory response after a SARS-CoV-2 infection in asymptomatic and mildly affected patients. F1000Research. 2021;9.

#### 21. Halpin SJ, McIvor C, Whyatt G, Adams A, Harvey O, McLean L, et al. Postdischarge symptoms and rehabilitation needs in survivors of COVID‐19 infection: A cross‐sectional evaluation. Journal of medical virology. 2021;93(2):1013-22 %@ 0146-6615.

#### 22. Guler SA, Ebner L, Beigelman C, Bridevaux P-O, Brutsche M, Clarenbach C, et al. Pulmonary function and radiological features four months after COVID-19: first results from the national prospective observational Swiss COVID-19 lung study. European respiratory journal %@ 0903-1936. 2021.

#### 23. Guedj E, Campion JY, Dudouet P, Kaphan E, Bregeon F, Tissot-Dupont H, et al. (18)F-FDG brain PET hypometabolism in patients with long COVID. Eur J Nucl Med Mol Imaging. 2021:1-11.

#### 24. Fisher KA, Olson SM, Tenforde MW, Self WH, Wu M, Lindsell CJ, et al. Symptoms and recovery among adult outpatients with and without COVID-19 at 11 healthcare facilities—July 2020, United States. Influenza and other Respiratory Viruses. 2021.

#### 25. Dani M, Dirksen A, Taraborrelli P, Torocastro M, Panagopoulos D, Sutton R, et al. Autonomic dysfunction in 'long COVID': rationale, physiology and management strategies. Clinical medicine (London, England). 2021;21(1):e63-e7.

#### 26. Curci C, Negrini F, Ferrillo M, Bergonzi R, Bonacci E, Camozzi DM, et al. Functional outcome after inpatient rehabilitation in post-intensive care unit COVID-19 patients: findings and clinical implications from a real-practice retrospective study. Eur J Phys Rehabil Med. 2021.

#### 27. Bickton FM, Chisati E, Rylance J, Morton B. An improvised pulmonary tele-rehabilitation programme for post-acute COVID-19 patients would be feasible and acceptable in a low-resource setting: a case report. Am J Phys Med Rehabil. 2021;Publish Ahead of Print.

#### 28. Bellan M, Soddu D, Balbo PE, Baricich A, Zeppegno P, Avanzi GC, et al. Respiratory and Psychophysical Sequelae Among Patients With COVID-19 Four Months After Hospital Discharge. JAMA Network Open. 2021;4(1):e2036142-e.

#### 29. Zhao Y-m, Shang Y-m, Song W-b, Li Q-q, Xie H, Xu Q-f, et al. Follow-up study of the pulmonary function and related physiological characteristics of COVID-19 survivors three months after recovery. EClinicalMedicine. 2020;25:100463.

#### 30. Yelin D, Margalit I, Yahav D, Runold M, Bruchfeld J. Long COVID-19-it's not over until? Clin Microbiol Infect. 2020.

#### 31. Wood E, Hall KH, Tate W. Role of mitochondria, oxidative stress and the response to antioxidants in myalgic encephalomyelitis/chronic fatigue syndrome: a possible approach to SARS-CoV-2 ‘long-haulers’? Chronic diseases and translational medicine. 2020.

#### 32. Wade DT. Rehabilitation after COVID-19: an evidence-based approach. Clinical Medicine. 2020.

#### 33. Vink M, Vink-Niese A, editors. Could Cognitive Behavioural Therapy Be an Effective Treatment for Long COVID and Post COVID-19 Fatigue Syndrome? Lessons from the Qure Study for Q-Fever Fatigue Syndrome. Healthcare; 2020: Multidisciplinary Digital Publishing Institute.

#### 34. van den Borst B, Peters JB, Brink M, Schoon Y, Bleeker-Rovers CP, Schers H, et al. Comprehensive health assessment three months after recovery from acute COVID-19. Clinical Infectious Diseases. 2020.

#### 35. Tumlinson A, Altman W, Glaudemans J, Gleckman H, Grabowski DC. Post‐acute care preparedness in a COVID‐19 world. Journal of the American Geriatrics Society. 2020;68(6):1150-4.

#### 36. Townsend L, Dyer AH, Jones K, Dunne J, Mooney A, Gaffney F, et al. Persistent fatigue following SARS-CoV-2 infection is common and independent of severity of initial infection. Plos one. 2020;15(11):e0240784 %@ 1932-6203.

#### 37. Touré A, Donamou J, Camara AY, Dramé BA, BAH OA. Post-COVID-19 Late Pulmonary Embolism in a Young Woman about a Case. Open Journal of Emergency Medicine. 2020;8(4):79-85.

#### 38. Torres-Castro R, Vasconcello-Castillo L, Alsina-Restoy X, Solis-Navarro L, Burgos F, Puppo H, et al. Respiratory function in patients post-infection by COVID-19: a systematic review and meta-analysis. Pulmonology %@ 2531-0437. 2020.

#### 39. The L. Facing up to long COVID. Lancet. 2020;396(10266):1861.

#### 40. Tabatabaei SMH, Rajebi H, Moghaddas F, Ghasemiadl M, Talari H. Chest CT in COVID-19 pneumonia: what are the findings in mid-term follow-up? Emergency Radiology. 2020;27(6):711-9 %@ 1438-5.

#### 41. Sun T, Guo L, Tian F, Dai T, Xing X, Zhao J, et al. Rehabilitation of patients with COVID-19. Expert Review of Respiratory Medicine. 2020;14(12):1249-56.

#### 42. Sollini M, Ciccarelli M, Cecconi M, Aghemo A, Morelli P, Gelardi F, et al. Vasculitis changes in COVID-19 survivors with persistent symptoms: an [18 F] FDG-PET/CT study. European journal of nuclear medicine and molecular imaging. 2020:1-7.

#### 43. Sivan M, Taylor S. NICE guideline on long covid. British Medical Journal Publishing Group; 2020.

#### 44. Shah AS, Wong AW, Hague CJ, Murphy DT, Johnston JC, Ryerson CJ, et al. A prospective study of 12-week respiratory outcomes in COVID-19-related hospitalisations. Thorax %@ 0040-6376. 2020.

#### 45. Salisbury R, Iotchkova V, Jaafar S, Morton J, Sangha G, Shah A, et al. Incidence of symptomatic, image-confirmed venous thromboembolism following hospitalization for COVID-19 with 90-day follow-up. Blood advances. 2020;4(24):6230-9.

#### 46. Roberts LN, Whyte MB, Georgiou L, Giron G, Czuprynska J, Rea C, et al. Postdischarge venous thromboembolism following hospital admission with COVID-19. Blood, The Journal of the American Society of Hematology. 2020;136(11):1347-50.

#### 47. Puntmann VO, Carerj ML, Wieters I, Fahim M, Arendt C, Hoffmann J, et al. Outcomes of cardiovascular magnetic resonance imaging in patients recently recovered from coronavirus disease 2019 (COVID-19). JAMA cardiology. 2020;5(11):1265-73.

#### 48. Puchner B, Sahanic S, Kirchmair R, Pizzini A, Sonnweber B, WÖll E, et al. Beneficial effects of multi-disciplinary rehabilitation in post-acute COVID-19-an observational cohort study. European journal of physical and rehabilitation medicine %@ 1973-9087. 2021.

#### 49. Pinto M, Gimigliano F, De Simone S, Costa M, Bianchi AAM, Iolascon G. Post-Acute COVID-19 Rehabilitation Network Proposal: From Intensive to Extensive and Home-Based IT Supported Services. International Journal of Environmental Research and Public Health. 2020;17(24):9335.

#### 50. Petersen MS, Kristiansen MF, Hanusson KD, Danielsen ME, Gaini S, Strøm M, et al. Long COVID in the Faroe Islands-a longitudinal study among non-hospitalized patients. Clinical Infectious Diseases. 2020.

#### 51. Perego E, Callard F, Stras L, Melville-Jóhannesson B, Pope R, Alwan NA. Why the Patient-Made Term'Long Covid'is needed. Wellcome Open Research. 2020;5(224):224.

#### 52. Patell R, Bogue T, Koshy A, Bindal P, Merrill M, Aird WC, et al. Postdischarge thrombosis and hemorrhage in patients with COVID-19. Blood, The Journal of the American Society of Hematology. 2020;136(11):1342-6.

#### 53. Paneroni M, Simonelli C, Saleri M, Bertacchini L, Venturelli M, Troosters T, et al. Muscle strength and physical performance in patients without previous disabilities recovering from COVID-19 pneumonia. American journal of physical medicine & rehabilitation. 2020.

#### 54. Negrini S, Ferriero G, Kiekens C, Boldrini P. Facing in real time the challenges of the Covid-19 epidemic for rehabilitation. European journal of physical and rehabilitation medicine. 2020;56(3):313-5 %@ 1973-9095.

#### 55. Morris SB, Schwartz NG, Patel P, Abbo L, Beauchamps L, Balan S, et al. Case series of multisystem inflammatory syndrome in adults associated with SARS-CoV-2 infection—United Kingdom and United States, March–August 2020. Morbidity and Mortality Weekly Report. 2020;69(40):1450.

#### 56. Mitrani RD, Dabas N, Goldberger JJ. COVID-19 cardiac injury: Implications for long-term surveillance and outcomes in survivors. Heart rhythm. 2020;17(11):1984-90.

#### 57. Miller A. COVID‐19: not just an acute illness. Trends in Urology & Men's Health. 2020;11(6):17-9 %@ 2044-3730.

#### 58. Miglis MG, Prieto T, Shaik R, Muppidi S, Sinn D-I, Jaradeh S. A case report of postural tachycardia syndrome after COVID-19. Clinical Autonomic Research. 2020;30(5):449-51 %@ 1619-560.

#### 59. McMurray JC, May JW, Cunningham MW, Jones OY. Multisystem Inflammatory Syndrome in Children (MIS-C), a Post-viral Myocarditis and Systemic Vasculitis-A Critical Review of Its Pathogenesis and Treatment. Front Pediatr. 2020;8:626182.

#### 60. Mazza MG, De Lorenzo R, Conte C, Poletti S, Vai B, Bollettini I, et al. Anxiety and depression in COVID-19 survivors: Role of inflammatory and clinical predictors. Brain, behavior, and immunity. 2020;89:594-600 %@ 0889-1591.

#### 61. Mandal S, Barnett J, Brill SE, Brown JS, Denneny EK, Hare SS, et al. ‘Long-COVID’: a cross-sectional study of persisting symptoms, biomarker and imaging abnormalities following hospitalisation for COVID-19. Thorax. 2020.

#### 62. Ludvigsson JF. Case report and systematic review suggest that children may experience similar long‐term effects to adults after clinical COVID‐19. Acta Paediatrica. 2020.

#### 63. Lu Y, Li X, Geng D, Mei N, Wu P-Y, Huang C-C, et al. Cerebral micro-structural changes in COVID-19 patients–an MRI-based 3-month follow-up study. EClinicalMedicine. 2020;25:100484 %@ 2589-5370.

#### 64. Liu K, Zhang W, Yang Y, Zhang J, Li Y, Chen Y. Respiratory rehabilitation in elderly patients with COVID-19: A randomized controlled study. Complementary therapies in clinical practice. 2020;39:101166.

#### 65. Liu C, Ye L, Xia R, Zheng X, Yuan C, Wang Z, et al. Chest computed tomography and clinical follow-up of discharged patients with COVID-19 in Wenzhou City, Zhejiang, China. Annals of the American Thoracic Society. 2020;17(10):1231-7 %@ 2329-6933.

#### 66. Liang L, Yang B, Jiang N, Fu W, He X, Zhou Y, et al. Three-Month Follow-Up Study of Survivors of Coronavirus Disease 2019 after Discharge. Journal of Korean medical science. 2020;35(47).

#### 67. Li Z, Zheng C, Duan C, Zhang Y, Li Q, Dou Z, et al. Rehabilitation needs of the first cohort of post-acute COVID-19 patients in Hubei, China. European journal of physical and rehabilitation medicine. 2020;56(3):339-44 %@ 1973-9087.

#### 68. Lerum TV, Aaløkken TM, Brønstad E, Aarli B, Ikdahl E, Lund KMA, et al. Dyspnoea, lung function and CT findings three months after hospital admission for COVID-19. European Respiratory Journal %@ 0903-1936. 2020.

#### 69. Ladds E, Rushforth A, Wieringa S, Taylor S, Rayner C, Husain L, et al. Persistent symptoms after Covid-19: qualitative study of 114 “long Covid” patients and draft quality principles for services. BMC health services research. 2020;20(1):1-13.

#### 70. Kingstone T, Taylor AK, O'Donnell CA, Atherton H, Blane DN, Chew-Graham CA. Finding the'right'GP: a qualitative study of the experiences of people with long-COVID. BJGP open. 2020;4(5).

#### 71. Jiang H-j, Nan J, Lv Z-y, Yang J. Psychological impacts of the COVID-19 epidemic on Chinese people: Exposure, post-traumatic stress symptom, and emotion regulation. Asian Pacific Journal of Tropical Medicine. 2020;13(6):252.

#### 72. Jacobs LG, Paleoudis EG, Lesky-Di Bari D, Nyirenda T, Friedman T, Gupta A, et al. Persistence of symptoms and quality of life at 35 days after hospitalization for COVID-19 infection. Plos One. 2020;15(12).

#### 73. Małek ŁA, Marczak M, Miłosz‐Wieczorek B, Konopka M, Braksator W, Drygas W, et al. Cardiac involvement in consecutive elite athletes recovered from Covid‐19: A magnetic resonance study. Journal of Magnetic Resonance Imaging %@ 1053-1807. 2021.

#### 74. Honigsbaum M, Krishnan L. Taking pandemic sequelae seriously: from the Russian influenza to COVID-19 long-haulers. The Lancet. 2020;396(10260):1389-91.

#### 75. Higgins V, Sohaei D, Diamandis EP, Prassas I. COVID-19: from an acute to chronic disease? Potential long-term health consequences. Critical reviews in clinical laboratory sciences. 2020:1-23 %@ 1040-8363.

#### 76. Greenhalgh T, Knight M, Buxton M, Husain L. Management of post-acute covid-19 in primary care. Bmj. 2020;370.

#### 77. Greenhalgh T, Knight M. Long COVID: A Primer for Family Physicians. American Family Physician. 2020;102(12):716-7.

#### 78. Goërtz YMJ, Van Herck M, Delbressine JM, Vaes AW, Meys R, Machado FVC, et al. Persistent symptoms 3 months after a SARS-CoV-2 infection: the post-COVID-19 syndrome? ERJ Open Res. 2020;6(4).

#### 79. Godfred-Cato S, Bryant B, Leung J, Oster ME, Conklin L, Abrams J, et al. COVID-19-Associated Multisystem Inflammatory Syndrome in Children - United States, March-July 2020. MMWR Morb Mortal Wkly Rep. 2020;69(32):1074-80.

#### 80. George PM, Barratt SL, Condliffe R, Desai SR, Devaraj A, Forrest I, et al. Respiratory follow-up of patients with COVID-19 pneumonia. Thorax. 2020;75(11):1009-16 %@ 0040-6376.

#### 81. Garrigues E, Janvier P, Kherabi Y, Le Bot A, Hamon A, Gouze H, et al. Post-discharge persistent symptoms and health-related quality of life after hospitalization for COVID-19. Journal of Infection. 2020;81(6):e4-e6 %@ 0163-4453.

#### 82. Forte G, Favieri F, Tambelli R, Casagrande M. COVID-19 Pandemic in the Italian Population: Validation of a Post-Traumatic Stress Disorder Questionnaire and Prevalence of PTSD Symptomatology. International Journal of Environmental Research and Public Health. 2020;17(11):4151.

#### 83. Ferraro F, Calafiore D, Dambruoso F, Guidarini S, de Sire A. COVID-19 related fatigue: Which role for rehabilitation in post-COVID-19 patients? A case series. J Med Virol. 2020.

#### 84. Engelen M, Vanassche T, Balthazar T. Incidence of venous thromboembolism in patients discharged after COVID-19 hospitalisation. Res Pract Thromb Haemost. 2020;4(Suppl 1).

#### 85. Curci C, Pisano F, Bonacci E, Camozzi DM, Ceravolo C, Bergonzi R, et al. Early rehabilitation in post-acute COVID-19 patients: data from an Italian COVID-19 Rehabilitation Unit and proposal of a treatment protocol. Eur J Phys Rehabil Med. 2020;56(5):633-41.

#### 86. COVID NL. let patients help define long-lasting COVID symptoms. Nature. 2020;586(7828):170.

#### 87. Carvalho-Schneider C, Laurent E, Lemaignen A, Beaufils E, Bourbao-Tournois C, Laribi S, et al. Follow-up of adults with noncritical COVID-19 two months after symptom onset. Clin Microbiol Infect. 2020.

#### 88. Carfì A, Bernabei R, Landi F. Persistent symptoms in patients after acute COVID-19. Jama. 2020;324(6):603-5 %@ 0098-7484.

#### 89. Callard F, Perego E. How and why patients made Long Covid. Social Science & Medicine. 2020:113426.

#### 90. Brito D, Meester S, Yanamala N, Patel HB, Balcik BJ, Casaclang-Verzosa G, et al. High Prevalence of Pericardial Involvement in College Student Athletes Recovering From COVID-19. JACC: Cardiovascular Imaging %@ 1936-878X. 2020.

#### 91. Boyraz G, Legros DN. Coronavirus disease (COVID-19) and traumatic stress: probable risk factors and correlates of posttraumatic stress disorder. Journal of Loss and Trauma. 2020;25(6-7):503-22 %@ 1532-5024.

#### 92. Boscolo-Rizzo P, Borsetto D, Fabbris C, Spinato G, Frezza D, Menegaldo A, et al. Evolution of altered sense of smell or taste in patients with mildly symptomatic COVID-19. JAMA Otolaryngology–Head & Neck Surgery. 2020;146(8):729-32.

#### 93. Belli S, Balbi B, Prince I, Cattaneo D, Masocco F, Zaccaria S, et al. Low physical functioning and impaired performance of activities of daily life in COVID-19 patients who survived the hospitalisation. European Respiratory Journal. 2020:2002096.

#### 94. Becker RCX. Anticipating the long-term cardiovascular effects of COVID-19. Springer; 2020.

#### 95. Bastopcu M. Extensive arterial thrombus following discharge after a Covid-19 infection. Annals of Vascular Surgery. 2020.

#### 96. Barker-Davies RM, O'Sullivan O, Senaratne KPP, Baker P, Cranley M, Dharm-Datta S, et al. The Stanford Hall consensus statement for post-COVID-19 rehabilitation. British Journal of Sports Medicine. 2020.

#### 97. Baig AM. Deleterious Outcomes in Long-Hauler COVID-19: The Effects of SARS-CoV-2 on the CNS in Chronic COVID Syndrome. ACS chemical neuroscience. 2020.

#### 98. Asim M, van Teijlingen E, Sathian B. Coronavirus Disease (COVID-19) and the risk of Post-Traumatic Stress Disorder: A mental health concern in Nepal. Nepal Journal of Epidemiology. 2020;10(2):841.

#### 99. Arnold DT, Hamilton FW, Milne A, Morley AJ, Viner J, Attwood M, et al. Patient outcomes after hospitalisation with COVID-19 and implications for follow-up: results from a prospective UK cohort. Thorax %@ 0040-6376. 2020.

#### 100. Amenta EM, Spallone A, Rodriguez-Barradas MC, El Sahly HM, Atmar RL, Kulkarni PA, editors. Postacute COVID-19: An Overview and Approach to Classification2020: Oxford University Press US.

#### 101. Altundag A, Saatci O, Sanli DET, Duz OA, Sanli AN, Olmuscelik O, et al. The temporal course of COVID-19 anosmia and relation to other clinical symptoms. European Archives of Oto-Rhino-Laryngology. 2020:1-7 %@ 1434-4726.

#### 102. Meeting the challenge of long COVID. Nature Medicine. 2020;26(12):1803-.

#### 103. Hertting O. More research is needed on the long‐term effects of COVID‐19 on children and adolescents. Wiley Online Library.

#### 104. COVID-19 rapid guideline: managing the long-term effects of COVID-19: NICE; [updated December 18, 2020. Available from: <https://www.nice.org.uk/guidance/ng188/chapter/Context>.

#### 105. association MEM. Post-viral fatigue (PVF) and Post-viral fatigue syndrome (PVFS) following coronavirus infection 2020 [Available from: <https://meassociation.org.uk/wp-content/uploads/MEA-PVF-and-PVFS-Following-Coronavirus-Infection-30.04.20.pdf>.

#### 106. Mahase E. Long covid could be four different syndromes, review suggests. British Medical Journal Publishing Group; 2020.

#### 107. Baig AM. Chronic COVID Syndrome: Need for an appropriate medical terminology for Long‐COVID and COVID Long‐Haulers. Journal of medical virology %@ 0146-6615. 2020.

#### 108. Marshall M. The lasting misery of coronavirus long-haulers. Nature. 2020:339-41.

#### 109. Nath A. Long-Haul COVID. Neurology. 2020;95(13):559-60.

#### 110. Yelin D, Wirtheim E, Vetter P, Kalil AC, Bruchfeld J, Runold M, et al. Long-term consequences of COVID-19: research needs. The Lancet Infectious Diseases. 2020;20(10):1115-7 %@ 473-3099.

#### 111. Siegelman JN. Reflections of a COVID-19 long hauler. JAMA. 2020;324(20):2031-2 %@ 0098-7484.

#### 112. Nabavi N. Long covid: How to define it and how to manage it. British Medical Journal Publishing Group; 2020.

#### 113. Wise J. Long covid: doctors call for research and surveillance to capture disease. bmj. 2020;370 %@ 1756-1833.

#### 114. Salman D, Vishnubala D, Le Feuvre P, Beaney T, Korgaonkar J, Majeed A, et al. Returning to physical activity after covid-19. bmj. 2021;372 %@ 1756-1833.

#### 115. Smith AP. Post-viral Fatigue: Implications for Long Covid. Asian Journal of Research in Infectious Diseases. 2021:17-23 %@ 2582-3221.

#### 116. Basheer A. Long COVID–Need for follow-up clinics. Journal of Current Research in Scientific Medicine. 2020;6(2):71 %@ 2455-3069.

#### 117. Butler M, Pollak TA, Rooney AG, Michael BD, Nicholson TR. Neuropsychiatric complications of covid-19. British Medical Journal Publishing Group; 2020.

#### 118. Burgers J. “Long covid”: the Dutch response. bmj. 2020;370 %@ 1756-1833.

#### 119. Shelley BP. Gaps in knowledge: Unmasking post-(Acute) COVID-19 syndrome and potential long-term complications in COVID-19 survivors. Archives of Medicine and Health Sciences. 2020;8(2):173 %@ 2321-4848.

#### 120. Serrano-Castro PJ, Estivill-Torrús G, Cabezudo-García P, Reyes-Bueno JA, Ciano Petersen N, Aguilar-Castillo MJ, et al. Impact of SARS-CoV-2 infection on neurodegenerative and neuropsychiatric diseases: a delayed pandemic? Neurologia. 2020;35(4):245-51.
